# Supplementary material
Source: Springer Nature journal article supplement (https://www.springermedizin.de/resource/supplementary/12887_2013_911_MOESM2_ESM.pdf/9476062)
Supplement: MOESM2 [file 9476062]

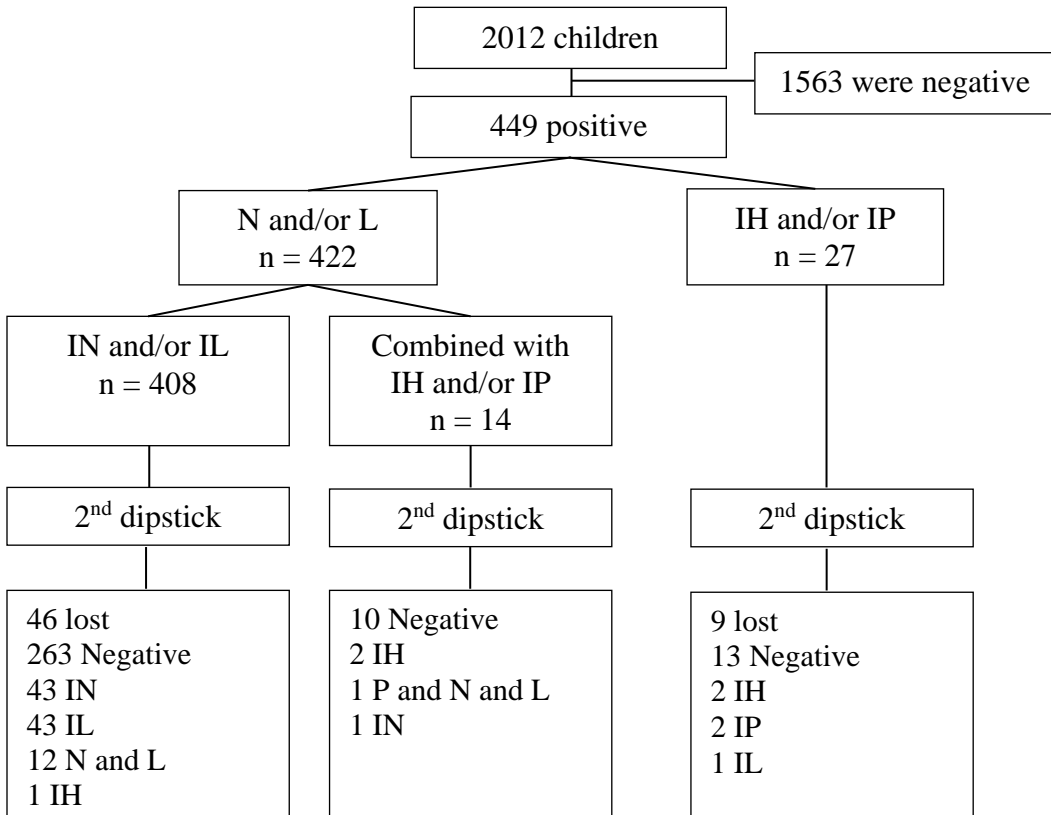

**N:** Nitrituria +  
**IN:** Isolated Nitrituria +  
**H:** Hematuria +  
**IH:** Isolated Hematuria +

**L:** Leucocyturia +  
**IL:** Isolated Leucocyturia +  
**P:** Proteinuria +  
**IP:** Isolated Proteinuria +
